# Supplementary material
Source: PubMed Central journal article supplement (PMC6858949)
Supplement: NIHMS1536672-supplement-1.pdf [file NIHMS1536672-supplement-1.pdf]

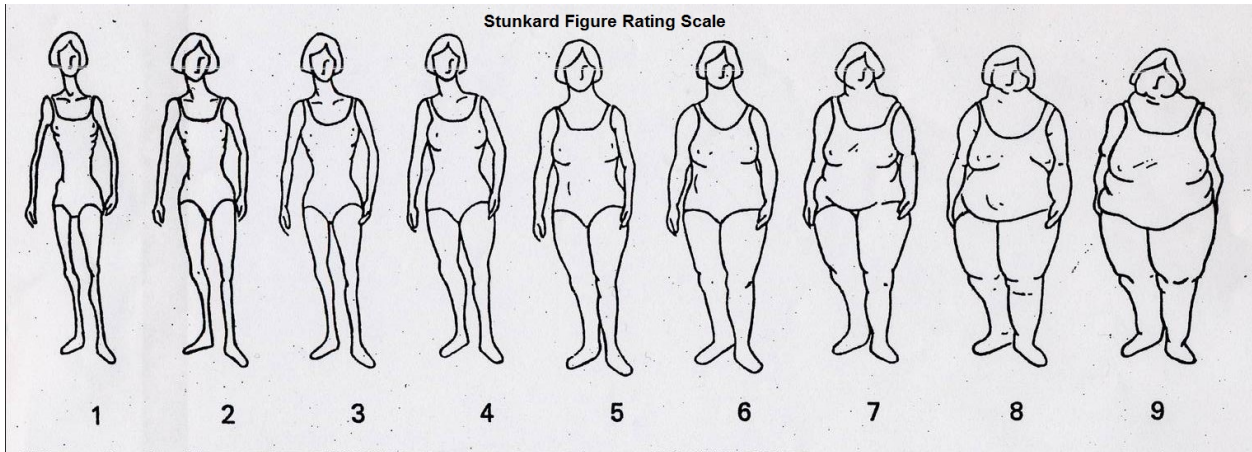

Instructions: Write the number of the figure above that you would pick for each question below.

(1) choose your ideal figure \_\_\_\_\_

(2) choose the figure that reflects how you think you look \_\_\_\_\_

(3) choose the figure that reflects how you feel most of the time \_\_\_\_\_
